# Supplementary material for: Effect Factor of Arsenite and Arsenate Removal by a Manufactured Material: Activated Carbon-Supported Nano-TiO2
Source: Hindawi journal article supplement (doi:10.1155/2020/6724157), 2020-09-18
Supplement: f1 [file 6724157.f1.docx]

**Supplementary information**

**Table S1** Metal oxide amount loaded in adsorbent

| Element amount loaded (mg/g) | | | Metal oxide amount loaded (mg/g) |
| --- | --- | --- | --- |
| Ti | Average (Ti) | TiO2 | |
| 107.04 |  |  | |
| 107.65 | 107.57 | 179.50 | |
| 108.02 |  |  | |

**Table** **S2**The pseudo-first-order and the pseudo-second-order kinetic parameters for arsenic removal

|  | The pseudo-first-order kinetic | | The pseudo-second-order kinetic | |
| --- | --- | --- | --- | --- |
|  | K1 | R2 | K2 | R2 |
| As(III) | 0.3782 | 0.9366 | 49.8284 | 0.9997 |
| As(V) | 2.3075 | 0.9683 | 514.8381 | 0.9999 |

**Table S****3**Freundlich and Langmuir isotherm constants

|  | Freundlich | | | Langmuir | | |
| --- | --- | --- | --- | --- | --- | --- |
| KF | R2 | n | Qm | R2 | KL |
| As(III) | 0.3685 | 0.9660 | 1.5049 | 13.3815 | 0.8265 | 0.0258 |
| As(V) | 1.1720 | 0.9600 | 2.1571 | 13.1770 | 0.8531 | 0.0736 |
